# Supplementary material for: Exoribonuclease-Resistant RNAs Exist within both Coding and Noncoding Subgenomic RNAs
Source: PubMed Central journal article supplement (PMC6299227; doi:10.1128/mbio.02461-18), 2018-12-18
Supplement: mbo006184225sf4.pdf [file mbo006184225sf4.pdf]

A

```

# STOCKHOLM 1.0
# UNIMARK
#=GF ID Multiple_alignment
RedCloverNecroticMosaicVirus_1          GCGUAGCCUCCACCCGAGUUGCAAGAG-GGAACGCGC-AGUCUCG-CC
RedCloverNecroticMosaicVirus_J04357-1  GCGUAGCCUCCACCCGAGUUGCAAGAGGGGAACACGC-AGUCUCG-CC
RedCloverNecroticMosaicVirus_AB034916-1 GCGCAGCCUCCAUCCGAGUUGCAAGAGAGGAAGACGC-AGUCUCG-CC
SweetCloverNecroticMosaicVirus_L07884-1 GCGUAACCUCCAUCCGAGUUGCAAGAGAGGGAAACGC-AGUCUCG-CC
CarnationRingSpotVirus_L18870-2        CCGUAGCCGCCAACAAAGUUGCAAGAGCGGGCGUUGCUAGCCUUUGCC
#=GC SS_cons
//

```

B

```

# STOCKHOLM 1.0
# UNIMARK
#=GF ID Multiple_alignment
RedCloverNecroticMosaicVirus_1          -GCGUAGCCUCCACC-CGAG-UUGCAAGAG-GGAACGCGC-AGU-CUCG--CC
RedCloverNecroticMosaicVirus_J04357-1  -GCGUAGCCUCCACC-CGAG-UUGCAAGAGGGGAACACGC-AGU-CUCG--CC
RedCloverNecroticMosaicVirus_AB034916-1 -GCGCAGCCUCCAUC-CGAG-UUGCAAGAGAGGAAGACGC-AGU-CUCG--CC
SweetCloverNecroticMosaicVirus_L07884-1 -GCGUAACCUCCAUC-CGAG-UUGCAAGAGAGGGAAACGC-AGU-CUCG--CC
CarnationRingSpotVirus_L18870-2        -CCGUAGCCGCCAAC-AAAG-UUGCAAGAGCGGGCGUUGCUAGC-CUUU-GCC
WheatLeafYellowingAssociatedVirus_NC_035451 ACGUCAGCCGCCAAC-ACAG-UUGCAAGAGCGGAAGACG-UAGU-CUGU-GUC
SugarcaneYellowLeafVirus_NC_000874     CCCGAGCCACCAUA-UAGG-UUGCAAGAGUGGAACGGGA-AGU-CCUA-UA-
#=GC SS_cons
//

```
