# Supplementary material for: Exoribonuclease-Resistant RNAs Exist within both Coding and Noncoding Subgenomic RNAs
Source: PubMed Central journal article supplement (PMC6299227; doi:10.1128/mbio.02461-18), 2018-12-18
Supplement: mbo006184225st1.pdf [file mbo006184225st1.pdf]

| Abbreviation | Classification                         | GenBank ID | Total ssRNA length (nt) | xrRNA boundaries (from the 1st nucleotide of the P1 stem to the last nucleotide of the pseudoknot) | Sequence range shown in sequence alignment (i.e., comprising xrRNA flanking sequences) | Genomic context (for 3'UTR xrRNA, distance up to the first nucleotide of the P1 stem; for intergenic xrRNAs, distance from the 3'-most nucleotide of the pseudoknot) |
|--------------|----------------------------------------|------------|-------------------------|----------------------------------------------------------------------------------------------------|----------------------------------------------------------------------------------------|----------------------------------------------------------------------------------------------------------------------------------------------------------------------|
| RCNMV        | Tombusviridae; Dianthovirus            | NC_003756  | 3890                    | 3461-3504                                                                                          | 3458-3527                                                                              | 3' UTR; 11 nt downstream from STOP codon                                                                                                                             |
| RCNMV        | Tombusviridae; Dianthovirus            | AB034916   | 3890                    | 3460-3503                                                                                          | 3457-3526                                                                              | 3' UTR; 11 nt from STOP codon                                                                                                                                        |
| SCNMV        | Tombusviridae; Dianthovirus            | NC_003806  | 3876                    | 3446-3489                                                                                          | 3443-3512                                                                              | 3' UTR; 3 nt from STOP codon                                                                                                                                         |
| CRSV         | Tombusviridae; Dianthovirus            | NC_003530  | 3840                    | 3399-3444                                                                                          | 3396-3469                                                                              | Frameshifting element close to 3' UTR                                                                                                                                |
| MCMV         | Tombusviridae; Machlomovirus           | NC_003627  | 4437                    | 4101-4143                                                                                          | 4098-4163                                                                              | 3' UTR; coincides with beginning of sgRNA2                                                                                                                           |
| OPMV         | Tombusviridae; Umbravirus              | NC_027710  | 4230                    | 3585-3629                                                                                          | 3582-3656                                                                              | 3' UTR; 4 nt from STOP codon                                                                                                                                         |
| TBTV         | Tombusviridae; Umbravirus              | NC_004366  | 4152                    | 3520-3564                                                                                          | 3517-3573                                                                              | 3' UTR; 10 nt from STOP codon                                                                                                                                        |
| OPMV         | Tombusviridae; Umbravirus              | KJ372735   | 2739                    | 2080-2124                                                                                          | 2077-2133                                                                              | 69 nt to AUG from ORF3 (starts at 2193)                                                                                                                              |
| CMoMV        | Tombusviridae; Umbravirus              | FJ188472   | 3957                    | 2658-2700                                                                                          | 2655-2709                                                                              | 73 nt to AUG from "long-distance movement protein" (starts at 2773)                                                                                                  |
| CMoMV        | Tombusviridae; Umbravirus              | NC_001726  | 4201                    | 2664-2706                                                                                          | 2661-2715                                                                              | 74 nt to AUG from ORF3 (starts at 2790)                                                                                                                              |
| IYMV2        | Tombusviridae; Umbravirus              | NC_034243  | 4196                    | 2888-2931                                                                                          | 2885-2940                                                                              | 77 nt to AUG from ORF3 (starts at 3008)                                                                                                                              |
| TBTV         | Tombusviridae; Umbravirus              | FN597051   | 4152                    | 2615-2659                                                                                          | 2612-2668                                                                              | 98 nt to AUG from ORF3 (starts at 2757)                                                                                                                              |
| GEV-1        | Luteoviridae; Enamovirus; unclassified | NC_034836  | 6176                    | 4192-4259                                                                                          | 4189-4267                                                                              | 5 nt to AUG from ORF3 (starts at 4264)                                                                                                                               |
| MABYV        | Luteoviridae; Polerovirus              | NC_010809  | 5674                    | 3335-3382                                                                                          | 3332-3391                                                                              | 7 nt to AUA from ORF3a (starts at 3389);<br>123 nt to AUG from ORF3-5 (starts at 3516)                                                                               |
| SABYV        | Luteoviridae; Polerovirus              | NC_018571  | 5843                    | 3458-3505                                                                                          | 3455-3514                                                                              | 7 nt to AUA from ORF3a (starts at 3512);<br>134 nt to AUG from ORF3-5 (starts at 3639)                                                                               |
| CpCSV        | Luteoviridae; Polerovirus              | NC_008249  | 5900                    | 3489-3534                                                                                          | 3486-3543                                                                              | 11 nt to AUA from ORF3a (starts at 3545);<br>129 nt to AUG from ORF3-5 (starts at 3663)                                                                              |
| CpPV1        | Luteoviridae; Polerovirus              | NC_034246  | 5845                    | 3380-3425                                                                                          | 3377-3434                                                                              | 11 nt to CUG from ORF3a (starts at 3436);<br>129 nt to AUG from ORF3-5 (starts at 3554)                                                                              |
| CoLRDV       | Luteoviridae; Polerovirus              | NC_014545  | 5866                    | 3451-3499                                                                                          | 3448-3508                                                                              | 13 nt to CUG from ORF3a (starts at 3512);<br>131 nt to AUG from ORF3-5 (starts at 3630)                                                                              |
| CYDV-RPV     | Luteoviridae; Polerovirus              | NC_004751  | 5723                    | 3566-3622                                                                                          | 3563-3613                                                                              | 14 nt to AUU from ORF3a (starts at 3627);<br>132 nt to AUG from ORF3-5 (starts at 3745)                                                                              |
| MYDV-RMV     | Luteoviridae; Polerovirus              | NC_021484  | 5612                    | 3335-3384                                                                                          | 3332-3393                                                                              | 14 nt to ACG from ORF3a (starts at 3398);<br>132 nt to AUG from ORF3-5 (starts at 3516)                                                                              |
| LeYV         | Luteoviridae; Polerovirus              | LN865080   | 1625                    | 845-893                                                                                            | 842-902                                                                                | 15 nt to AUA from ORF3a (starts at 908);<br>133 nt to AUG from ORF3-5 (starts at 1026)                                                                               |
| CRLV         | Luteoviridae; Polerovirus              | NC_006265  | 5723                    | 3308-3354                                                                                          | 3305-3363                                                                              | 16 nt to AUA from ORF3a (starts at 3370);<br>157 nt to AUG from ORF3-5 (starts at 3511)                                                                              |
| CpPV2        | Luteoviridae; Polerovirus              | NC_034247  | 5945                    | 3468-3514                                                                                          | 3465-3523                                                                              | 16 to AUA from ORF3a (starts at 3530);<br>134 nt to AUG from ORF3-5 (starts at 3648)                                                                                 |
| WLYaV        | Luteoviridae; Polerovirus              | NC_035451  | 5772                    | 3373-3418                                                                                          | 3370-3427                                                                              | 17 nt to CUG from ORF3a (starts at 3435);<br>135 nt to AUG from ORF3-5 (starts at 3553)                                                                              |
| SYV          | Luteoviridae; Polerovirus              | LN865083   | 1636                    | 842-902                                                                                            | 839-911                                                                                | 17 nt to AUA from ORF3a (starts at 919);<br>135 nt to AUG from ORF3-5 (starts at 1037)                                                                               |
| TVDV         | Luteoviridae; Polerovirus              | NC_010732  | 5920                    | 3460-3508                                                                                          | 3457-3517                                                                              | 18 nt to AUA from ORF3a (starts at 3526);<br>136 nt to AUG from ORF3-5 (starts at 3644)                                                                              |
| PLRV         | Luteoviridae; Polerovirus              | NC_001747  | 5987                    | 3509-3557                                                                                          | 3506-3566                                                                              | 18 nt to AUA from ORF3a (starts at 3575);<br>136 nt to AUG from ORF3-5 (starts at 3693)                                                                              |
| CABYV        | Luteoviridae; Polerovirus              | NC_003688  | 5669                    | 3320-3369                                                                                          | 3317-3378                                                                              | 18 nt to AUA from ORF3a (starts at 3387);<br>136 nt to AUG from ORF3-5 (starts at 3505)                                                                              |
| ScYLV        | Luteoviridae; Polerovirus              | NC_000874  | 5899                    | 3467-3512                                                                                          | 3464-3521                                                                              | 18 nt to CUG from ORF3a (starts at 3530);<br>136 nt to AUG from ORF3-5 (starts at 3648)                                                                              |
| PVYV         | Luteoviridae; Polerovirus              | NC_036803  | 6125                    | 3445-3493                                                                                          | 3442-3502                                                                              | 19 nt to AUA from ORF3a (starts at 3512);<br>137 nt to AUG from ORF3-5 (starts at 3630)                                                                              |
| PVYV         | Luteoviridae; Polerovirus              | JX427534   | 1381                    | 590-638                                                                                            | 587-647                                                                                | 19 nt to AUA from ORF3a (starts at 657);<br>137 nt to AUG from ORF3-5 (starts at 775)                                                                                |
| PABYV        | Luteoviridae; Polerovirus              | NC_030225  | 5813                    | 3381-3428                                                                                          | 3378-3437                                                                              | 22 nt to ACG from ORF3a (starts at 3450);<br>140 nt to AUG from ORF3-5 (starts at 3568)                                                                              |
| BWYV         | Luteoviridae; Polerovirus              | NC_004756  | 5666                    | 3346-3393                                                                                          | 3343-3402                                                                              | ORF3a defective;<br>138 nt to AUG from ORF3-5 (starts at 3531)                                                                                                       |
| BChV         | Luteoviridae; Polerovirus              | NC_002766  | 5776                    | 3425-3473                                                                                          | 3422-3482                                                                              | ORF3a defective;<br>134 nt to AUG from ORF3-5 (starts at 3607)                                                                                                       |
| BVG          | Luteoviridae; Polerovirus              | NC_029906  | 5620                    | 3328-3377                                                                                          | 3325-3386                                                                              | 131 nt to AUG from ORF3-5 (starts at 3508)                                                                                                                           |
| SaYV         | Luteoviridae; Polerovirus              | NC_025837  | 5820                    | 3487-3531                                                                                          | 3484-3540                                                                              | 131 nt to AUG from ORF3-5 (starts at 3662)                                                                                                                           |
| WCIMV        | Luteoviridae; Polerovirus              | NC_031747  | 6205                    | 3739-3783                                                                                          | 3736-3792                                                                              | 133 nt to AUG from ORF3-5 (starts at 3916)                                                                                                                           |
| HuPLV2       | Picornaviridae unclassified            | NC_033229  | 6083                    | 3706-3753                                                                                          | 3703-3762                                                                              | 133 nt to AUG from ORF3-5 (starts at 3886)                                                                                                                           |
| BWYV         | Luteoviridae; Polerovirus              | L39983     | 973                     | 341-389                                                                                            | 338-398                                                                                | 135 nt to AUG from ORF3-5 (starts at 524)                                                                                                                            |
| HuPLV1       | Picornaviridae unclassified            | NC_032224  | 4213                    | 3357-3410                                                                                          | 3354-3419                                                                              | 135 nt to AUG from ORF3-5 (starts at 3545)                                                                                                                           |
| PhBMYV       | Luteoviridae; Polerovirus              | NC_028793  | 5867                    | 3528-3576                                                                                          | 3525-3585                                                                              | 135 nt to AUG from ORF3-5 (starts at 3711)                                                                                                                           |
| PhBMYV       | Luteoviridae; Polerovirus              | KT963000   | 5855                    | 3532-3580                                                                                          | 3529-3589                                                                              | 135 nt to AUG from ORF3-5 (starts at 3715)                                                                                                                           |
| TV2          | Luteoviridae; Polerovirus              | NC_034265  | 5979                    | 3501-3549                                                                                          | 3498-3558                                                                              | 136 nt to AUG from ORF3-5 (starts at 3685)                                                                                                                           |
| AEYV         | Luteoviridae; Polerovirus              | NC_034207  | 5953                    | 3519-3567                                                                                          | 3516-3576                                                                              | 137 nt to AUG from ORF3-5 (starts at 3704)                                                                                                                           |
| LABYV        | Luteoviridae; Polerovirus              | NC_027703  | 5961                    | 3487-3538                                                                                          | 3484-3547                                                                              | 139 nt to AUG from ORF3-5 (starts at 3677)                                                                                                                           |
| WaPV         | Luteoviridae; Polerovirus              | KC960436   | 1025                    | 602-649                                                                                            | 599-657                                                                                | 139 nt to AUG from ORF3-5 (starts at 788)                                                                                                                            |
